# Supplementary material for: Structural basis of TRAPPIII‐mediated Rab1 activation
Source: PubMed Central journal article supplement (PMC8204860; doi:10.15252/embj.2020107607), 2021-05-21
Supplement: EMBJ-40-e107607-s004.pdf [file EMBJ-40-e107607-s004.pdf]

**This Appendix contains Appendix Tables S1-S4 and their references**

**Appendix Table S1: TRAPP complex composition**

**Note: Both TRAPP II and TRAPP III share a core set of subunits (green, middle column) and also contain unique subunits. The yeast names are shown first, with the names of the human proteins in parentheses.**

| <b>TRAPP III-specific</b> | <b>Shared Core Subunits</b> | <b>TRAPP II-specific</b> |
|---------------------------|-----------------------------|--------------------------|
| Trs85<br>(TRAPPC8)        | Trs33<br>(TRAPPC6A, B)      | Trs130<br>(TRAPPC10)     |
| (TRAPPC11)                | Trs31<br>(TRAPPC5)          | Trs120<br>(TRAPPC9)      |
| (TRAPPC12)                | Trs23<br>(TRAPPC4)          | Trs65                    |
| (TRAPPC13)                | Trs20<br>(TRAPPC2)          | Tca17<br>(TRAPPC2L)      |
|                           | Bet5<br>(TRAPPC1)           |                          |
|                           | Bet3<br>(TRAPPC3, C3L)      |                          |

**Appendix Table S2: Composition of synthetic liposomes used in this study**

|                                      | <b>Golgi</b> | <b>Golgi no cholesterol</b> | <b>Anionic</b> | <b>No PS/PA</b> | <b>No PI</b> | <b>10% PI<sub>4</sub>P</b> |
|--------------------------------------|--------------|-----------------------------|----------------|-----------------|--------------|----------------------------|
| <b>PC (mol %)</b>                    | 30           | 30                          | 51             | 36              | 60           | 58                         |
| <b>PE</b>                            | 10           | 10                          |                | 10              | 10           | 10                         |
| <b>PS</b>                            | 3            | 3                           | 3              |                 | 3            |                            |
| <b>PA</b>                            | 3            | 3                           | 3              |                 | 3            |                            |
| <b>PI</b>                            | 29           | 29                          | 29             | 29              |              |                            |
| <b>PI<sub>4</sub>P</b>               | 1            | 1                           | 1              | 1               |              | 10                         |
| <b>PI<sub>4,5</sub>P<sub>2</sub></b> |              |                             | 0.8            |                 |              |                            |
| <b>CDP-DAG</b>                       | 2            | 2                           | 2              | 2               | 2            |                            |
| <b>PO-DAG</b>                        | 4            | 4                           |                | 4               | 4            | 4                          |
| <b>DO-DAG</b>                        | 2            | 2                           |                | 2               | 2            | 2                          |
| <b>Ceramide</b>                      | 5            | 5                           |                | 5               | 5            | 5                          |
| <b>Cholesterol</b>                   | 10           |                             | 10             | 10              | 10           | 10                         |
| <b>DIR</b>                           | 1            | 1                           | 1              | 1               | 1            | 1                          |

Note: All lipids are from Avanti Polar Lipids. PC = phosphatidylcholine, PE = phosphatidylethanolamine, PS = phosphatidylserine, PA = phosphatidic acid, PI = phosphatidylinositol, PI<sub>4</sub>P = phosphatidylinositol 4-phosphate, PI<sub>4,5</sub>P<sub>2</sub> = phosphatidylinositol 4,5-bisphosphate, CDP-DAG = cytidine diphosphate diacylglycerol, PO-DAG = palmitoyl-oleoyl diacylglycerol, DO-DAG = dioleoyl diacylglycerol  
DIR = 1,1'-Dioctadecyl-3,3,3',3'-Tetramethylindotricarbocyanine Iodide

**Appendix Table S3: Plasmid list**

| Name      | Description                                                            | Vector      | Source                      |
|-----------|------------------------------------------------------------------------|-------------|-----------------------------|
| pLT21     | Trs33, Trs31, Trs23, Trs20, Bet3, Bet5                                 | pColaDuet-1 | (Thomas and Fromme, 2016)   |
| pLT35     | 6xHisTEV-Mrs6                                                          | pET28       | (Thomas and Fromme, 2016)   |
| pLT40     | GST-Gdi1 with cleavable tag                                            | pGEX-6P     | (Thomas and Fromme, 2016)   |
| pLT41     | 6xHisTEV-Bet2, Bet4                                                    | pCDF-Duet-1 | (Thomas and Fromme, 2016)   |
| pLT50     | GST-Ypt1 with cleavable tag                                            | pGEX-6P     | (Thomas and Fromme, 2016)   |
| pLT75     | mRFPmars-Ypt31 (D129N)-Fis1                                            | pRS415      | (Thomas et al., 2019)       |
| pLT77     | mRFPmars-Ypt1 (D124N)-Fis1                                             | pRS416      | (Thomas et al., 2019)       |
| pRS415    | Yeast centromeric vector with LEU2 marker                              | pRS415      | (Sikorski and Hieter, 1989) |
| pSV02     | mRFPmars-Ypt31 (D129N) <sub>HVD</sub> Ypt1-Fis1                        | pRS415      | (Thomas et al., 2019)       |
| Ypt1-7His | GST-Ypt1-7xHis cleavable N-terminal tag                                | pGEX-6P     | (McDonold and Fromme, 2014) |
| CFB2250   | GFP-Atg8                                                               | pRS416      | (Guan et al., 2001)         |
| CFB2730   | 6xHis-Trs85[501-698]                                                   | pETDuet-1   | This study                  |
| CFB2868   | 6xHis-Trs85, Trs33                                                     | pETDuet-1   | This study                  |
| CFB2991   | Trs85-mNeonGreen-3xHA                                                  | pRS415      | This study                  |
| CFB3125   | Trs85[R618E, R619E, R620E, K621E]-mNeonGreen-3xHA                      | pRS415      | This study                  |
| CFB3200   | Trs85[R618A, R619A, R620A, K621A]-mNeonGreen-3xHA                      | pRS415      | This study                  |
| CFB3222   | Trs85[Δ507-603]-mNeonGreen-3xHA                                        | pRS415      | This study                  |
| CFB3223   | 6xHis-Trs85[Δ507-603], Trs33                                           | pETDuet-1   | This study                  |
| CFB3511   | mRFPmars-Ypt1 in pRS416                                                | pRS416      | This study                  |
| CFB3710   | Trs85[501-698]-mNeonGreen-3xHA                                         | pRS415      | This study                  |
| CFB4191   | Trs85[K378A, K381A, K382A, K386A]-mNeonGreen-3xHA                      | pRS415      | This study                  |
| CFB4192   | Trs85[K378A, F379A, F380A, K381A, K382A, F383A, K386A]-mNeonGreen-3xHA | pRS415      | This study                  |
| CFB4193   | Trs85[K378E, K381E, K382E, K386E]-mNeonGreen-3xHA                      | pRS415      | This study                  |
| CFB4194   | Trs85[R620A]-mNeonGreen-3xHA                                           | pRS415      | This study                  |

|         |                                                                             |           |            |
|---------|-----------------------------------------------------------------------------|-----------|------------|
| CFB4195 | Trs85[R620E]-mNeonGreen-3xHA                                                | pRS415    | This study |
| CFB4227 | 6xHis-Trs85[K378A, F379A, F380A, K381A, K382A, F383A, K386A], Trs33         | pETDuet-1 | This study |
| CFB4229 | 6xHis-Trs85[K378E, K381E, K382E, K386E], Trs33                              | pETDuet-1 | This study |
| CFB4253 | mRFPmars-Ypt31 (D129N) <sub>HVD</sub> Ypt1[T181A, T182A, Q183A]-Fis1        | pRS415    | This study |
| CFB4254 | mRFPmars-Ypt31 (D129N) <sub>HVD</sub> Ypt1[K184A, K185A, E186A]-Fis1        | pRS415    | This study |
| CFB4255 | mRFPmars-Ypt31 (D129N) <sub>HVD</sub> Ypt1[D187A, K188A, N190A]-Fis1        | pRS415    | This study |
| CFB4256 | mRFPmars-Ypt31 (D129N) <sub>HVD</sub> Ypt1[V191A, N192A, L193A]-Fis1        | pRS415    | This study |
| CFB4257 | mRFPmars-Ypt31 (D129N) <sub>HVD</sub> Ypt1[K194A, Q196A, S197A]-Fis1        | pRS415    | This study |
| CFB4258 | mRFPmars-Ypt31 (D129N) <sub>HVD</sub> Ypt1[L198A, T199A, N200A, T201A]-Fis1 | pRS415    | This study |

**Appendix Table S4: Strain list**

| Name       | Description                                                                                                                       | Source                  |
|------------|-----------------------------------------------------------------------------------------------------------------------------------|-------------------------|
| SEY 6210   | MAT $\alpha$ <i>ura3-52 his3-<math>\Delta</math>200 leu2-3,112 lys2-801 trp1-<math>\Delta</math>901 suc2-<math>\Delta</math>9</i> | (Robinson et al., 1988) |
| SEY 6210.1 | MAT $\alpha$ <i>ura3-52 his3-<math>\Delta</math>200 leu2-3,112 lys2-801 trp1-<math>\Delta</math>901 suc2-<math>\Delta</math>9</i> | (Robinson et al., 1988) |
| CFY2449    | SEY6210.1 Trs85-mNeonGreen::HIS3                                                                                                  | (Thomas et al., 2018)   |
| CFY2692    | SEY6210 <i>trs85<math>\Delta</math>::KanMX</i>                                                                                    | (Thomas et al., 2018)   |
| CFY3585    | SEY 6210 Trs23-6xHis-3xFLAG::TRP, <i>trs85<math>\Delta</math>::KanMX</i>                                                          | This study              |
| CFY3307    | SEY6210.1 Bet3-GFP::HIS3, <i>trs85<math>\Delta</math>::KanMX</i> , Trs85-mNeonGreen-3xHA:URA                                      | This study              |

## Appendix References

- Guan J, Stromhaug PE, George MD, Habibzadegah-Tari P, Bevan A, Dunn WA, Klionsky DJ. 2001. Cvt18/Gsa12 Is Required for Cytoplasm-to-Vacuole Transport, Pexophagy, and Autophagy in *Saccharomyces cerevisiae* and *Pichia pastoris*. *MBoC* **12**:3821–3838. doi:10.1091/mbc.12.12.3821
- McDonold CM, Fromme JC. 2014. Four GTPases Differentially Regulate the Sec7 Arf-GEF to Direct Traffic at the trans-Golgi Network. *Dev Cell* **30**:759–767. doi:10.1016/j.devcel.2014.07.016
- Robinson JS, Klionsky DJ, Banta LM, Emr SD. 1988. Protein sorting in *Saccharomyces cerevisiae*: isolation of mutants defective in the delivery and processing of multiple vacuolar hydrolases. *Mol Cell Biol* **8**:4936–4948.
- Sikorski RS, Hieter P (1989) A system of shuttle vectors and yeast host strains designed for efficient manipulation of DNA in *Saccharomyces cerevisiae*. *Genetics* **122**: 19 – 27.
- Thomas LL, Fromme JC. 2016. GTPase cross talk regulates TRAPP II activation of Rab11 homologues during vesicle biogenesis. *J Cell Biol* **215**:499–513. doi:10.1083/jcb.201608123
- Thomas LL, Joiner AMN, Fromme JC. 2018. The TRAPP III complex activates the GTPase Ypt1 (Rab1) in the secretory pathway. *J Cell Biol* **217**:283–298. doi:10.1083/jcb.201705214
- Thomas LL, van der Vegt SA, Fromme JC. 2019. A Steric Gating Mechanism Dictates the Substrate Specificity of a Rab-GEF. *Developmental Cell* **48**:100-114.e9. doi:10.1016/j.devcel.2018.11.013
