# Supplementary material for: Structural basis of TRAPPIII‐mediated Rab1 activation
Source: PubMed Central journal article supplement (PMC8204860; doi:10.15252/embj.2020107607), 2021-05-21

From Figure panel 6F

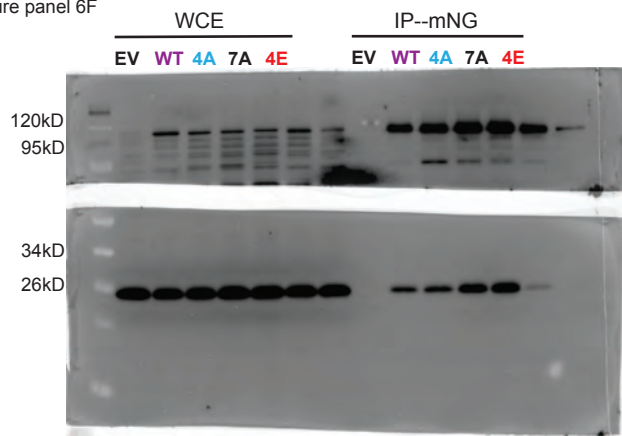

From Figure panel 6G

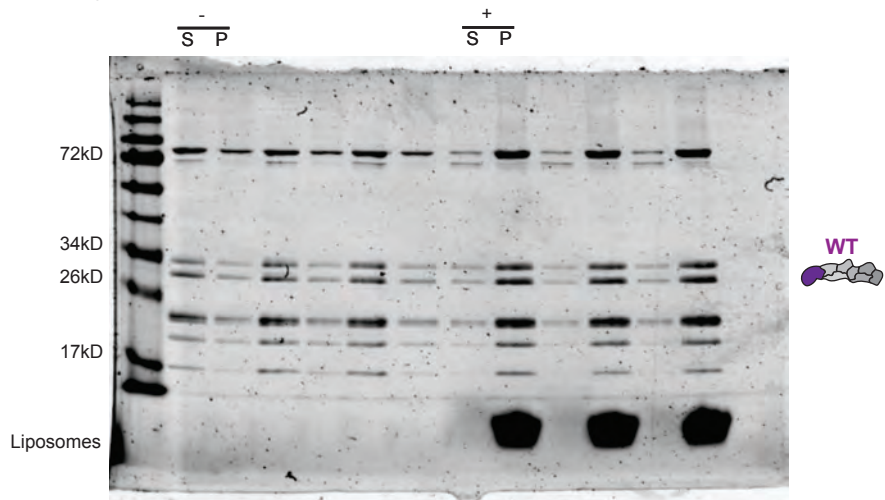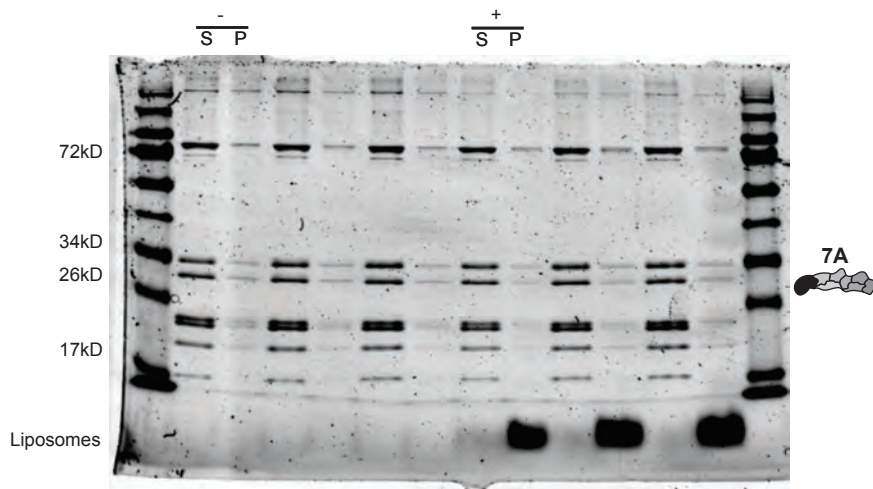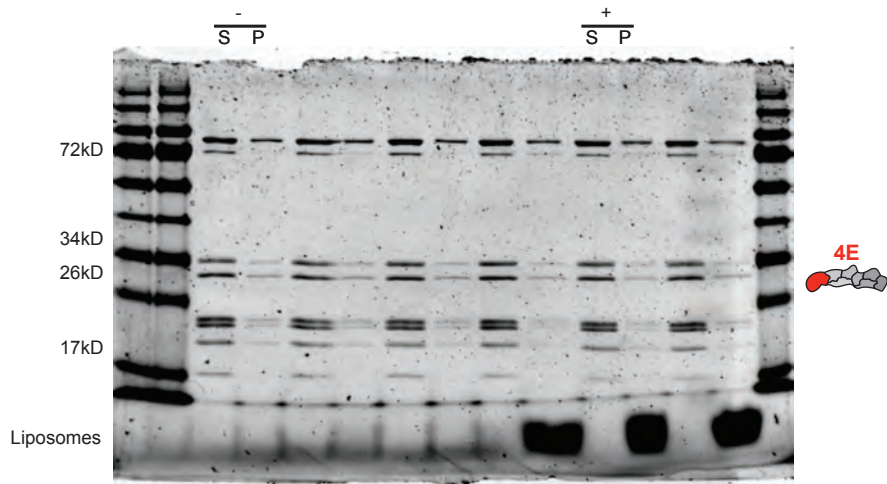

Supplement: EMBJ-40-e107607-s005.pdf [file EMBJ-40-e107607-s005.pdf]
