# Supplementary material for: Structural basis of TRAPPIII‐mediated Rab1 activation
Source: PubMed Central journal article supplement (PMC8204860; doi:10.15252/embj.2020107607), 2021-05-21

From Figure panel 1D

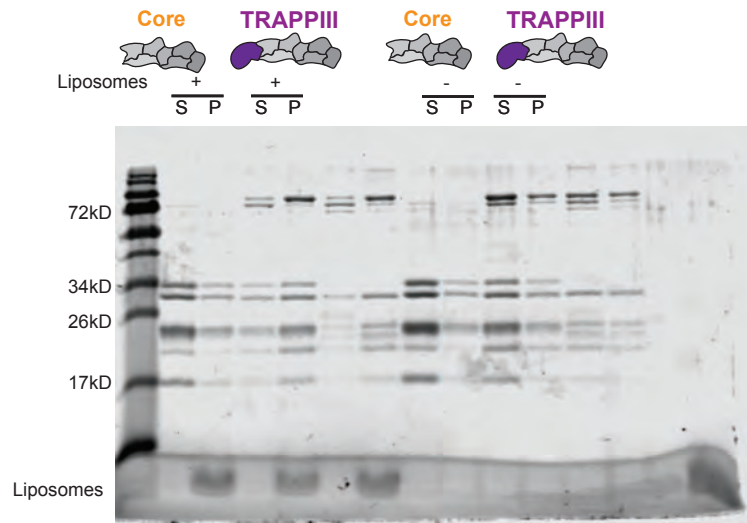

Supplement: EMBJ-40-e107607-s006.pdf [file EMBJ-40-e107607-s006.pdf]
