# Supplementary material for: Structural basis of TRAPPIII‐mediated Rab1 activation
Source: PubMed Central journal article supplement (PMC8204860; doi:10.15252/embj.2020107607), 2021-05-21

Core binding mutations

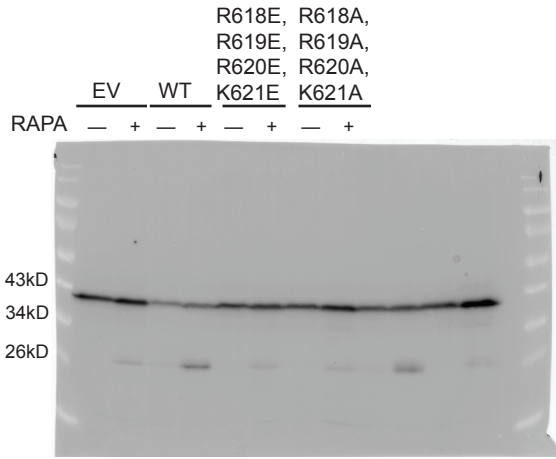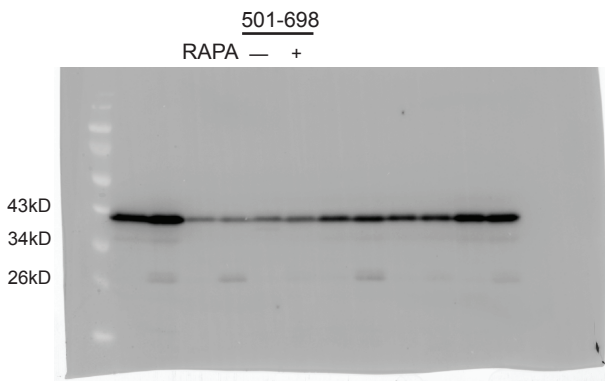

Membrane binding mutations

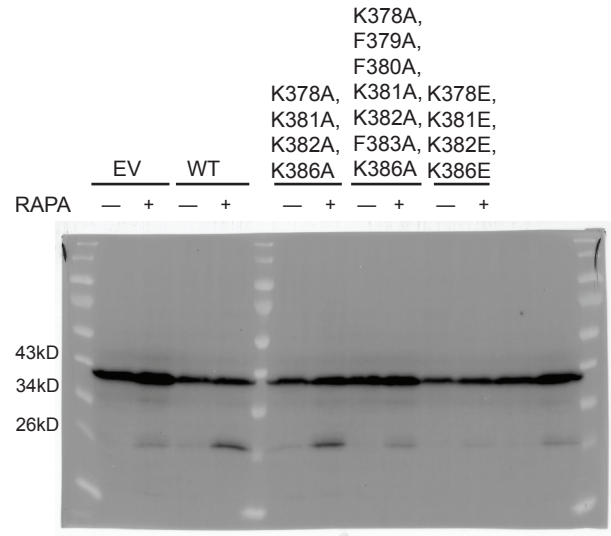

Supplement: EMBJ-40-e107607-s007.pdf [file EMBJ-40-e107607-s007.pdf]
